# Supplementary material for: Increased osteoblast viability at alkaline pH in vitro provides a new perspective on bone regeneration
Source: PubMed Central journal article supplement — Biochem Biophys Rep. 2017 Feb 27;10:17–25. doi: 10.1016/j.bbrep.2017.02.001 (PMC5614624; doi:10.1016/j.bbrep.2017.02.001), 2017-02-27
Supplement: mmc1.pdf [file mmc1.pdf]

## Fitting the proliferation parameters in a wide pH range

$$f(pH) = \frac{f_{\max}}{1 + \left(\frac{pH}{IC_{50}^{pH1}}\right)^{hs1}} - \frac{f_{\max}}{1 + \left(\frac{pH}{IC_{50}^{pH2}}\right)^{hs2}}$$

In the equation,  $IC_{50}^{pH1}$  and  $IC_{50}^{pH2}$  represent the characteristic half maximum pH values of the two function branches, which increase and decrease with the Hill slopes  $hs1$  and  $hs2$ , respectively. The function features a maximum theoretical plateau height of  $f_{\max}$ . Nevertheless, the overlap of the two branches usually results in the lower values  $f_{\max}^{graph}$  and deformed flanks.

| Parameter                       | Cell count   | WST-1 metabolism | ATP content |
|---------------------------------|--------------|------------------|-------------|
| $IC_{50}^{pH1} / IC_{50}^{pH2}$ | 9.10/8.99    | 8.09/8.93        | 8.02/8.98   |
| $hs1 / hs2$                     | 56.61/-89.31 | 13.42/-5.07      | 9.78/-49.68 |
| $f_{\max}$                      | 355.6        | 470.6            | 288.5       |
