# Supplementary material for: Increased osteoblast viability at alkaline pH in vitro provides a new perspective on bone regeneration
Source: PubMed Central journal article supplement — Biochem Biophys Rep. 2017 Feb 27;10:17–25. doi: 10.1016/j.bbrep.2017.02.001 (PMC5614624; doi:10.1016/j.bbrep.2017.02.001), 2017-02-27

## ATP content per cell

| ATP   |      | pH 7.2 | pH 7.4 | pH 7.8 | pH 8.4 | cell count |        | pH 7.2 | pH 7.4 | pH 7.8 | pH 8.4 |
|-------|------|--------|--------|--------|--------|------------|--------|--------|--------|--------|--------|
| day 1 | mean | 8.74   | 8.65   | 8.69   | 9.71   | mean       | 24400  | 23430  | 25950  | 21181  |        |
|       | Std. | 2.04   | 1.97   | 2.49   | 2.03   | Std.       | 4369   | 5701   | 7860   | 4000   |        |
| day 2 | mean | 17.27  | 18.74  | 19.81  | 20.63  | mean       | 43125  | 52600  | 61025  | 73055  |        |
|       | Std. | 5.17   | 6.93   | 4.25   | 3.82   | Std.       | 15641  | 16476  | 18383  | 15157  |        |
| day 3 | mean | 24.12  | 32.13  | 32.96  | 55.23  | mean       | 66900  | 83050  | 122700 | 113498 |        |
|       | Std. | 9.20   | 10.59  | 9.10   | 18.90  | Std.       | 39776  | 35872  | 49643  | 56811  |        |
| day 4 | mean | 30.27  | 39.64  | 49.18  | 62.85  | mean       | 92625  | 140400 | 217950 | 245884 |        |
|       | Std. | 12.30  | 11.78  | 10.14  | 14.81  | Std.       | 52077  | 58584  | 84706  | 108623 |        |
| day 5 | mean | 36.41  | 50.74  | 63.09  | 89.95  | mean       | 134325 | 165075 | 273825 | 281063 |        |
|       | Std. | 12.86  | 13.28  | 10.72  | 26.78  | Std.       | 75713  | 79322  | 114950 | 87707  |        |
| day 6 | mean | 37.86  | 52.13  | 65.34  | 119.45 | mean       | 154650 | 212925 | 299975 | 510701 |        |
|       | Std. | 18.40  | 14.87  | 19.17  | 48.44  | Std.       | 112710 | 103269 | 125095 | 243208 |        |

# ATP content per cell

ATP content per 1Mio. Cells

|       | pH 7.2 | pH 7.4 | pH 7.8 | pH 8.4 |      |
|-------|--------|--------|--------|--------|------|
| day 1 | 358.35 | 369.01 | 334.82 | 458.46 | mean |
|       | 83.58  | 83.98  | 96.09  | 95.71  | Std. |
| day 2 | 400.44 | 356.33 | 324.61 | 282.41 | mean |
|       | 119.84 | 131.68 | 69.59  | 52.23  | Std. |
| day 3 | 360.47 | 386.93 | 268.65 | 486.64 | mean |
|       | 137.53 | 127.49 | 74.18  | 166.51 | Std. |
| day 4 | 326.76 | 282.36 | 225.66 | 255.62 | mean |
|       | 132.81 | 83.91  | 46.51  | 60.25  | Std. |
| day 5 | 271.05 | 307.38 | 230.42 | 320.02 | mean |
|       | 95.71  | 80.45  | 39.14  | 95.27  | Std. |
| day 6 | 244.80 | 244.81 | 217.83 | 233.90 | mean |
|       | 119.01 | 69.82  | 63.91  | 94.85  | Std. |

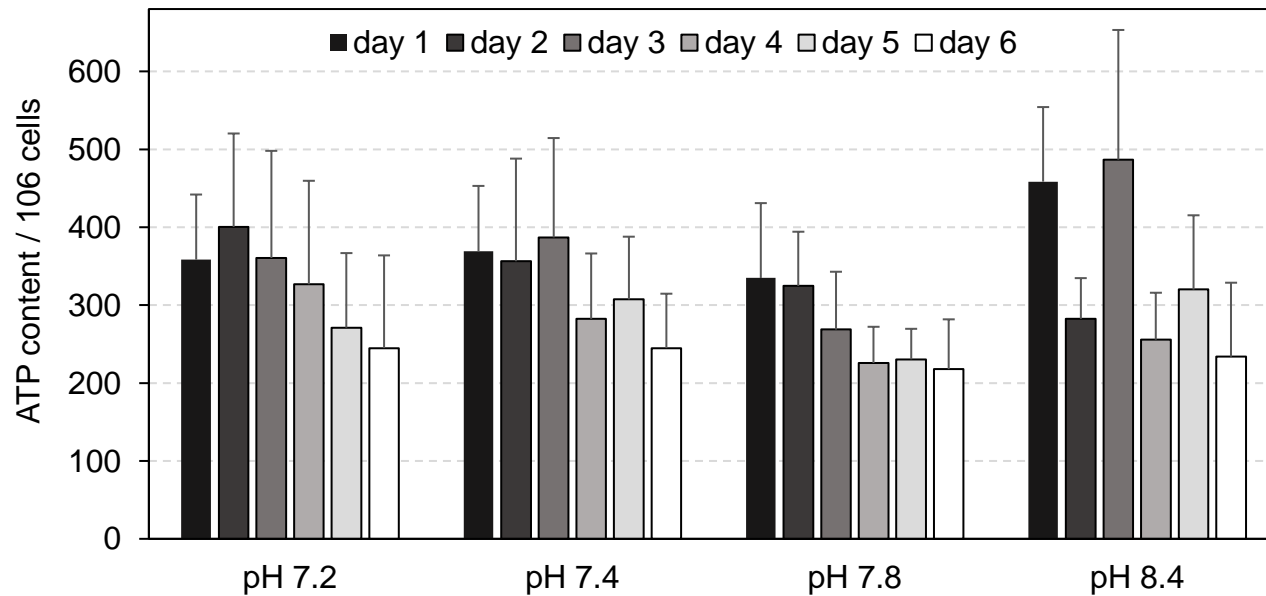

Supplement: mmc2.pdf [file mmc2.pdf]
