# Supplementary material for: Increased osteoblast viability at alkaline pH in vitro provides a new perspective on bone regeneration
Source: PubMed Central journal article supplement — Biochem Biophys Rep. 2017 Feb 27;10:17–25. doi: 10.1016/j.bbrep.2017.02.001 (PMC5614624; doi:10.1016/j.bbrep.2017.02.001), 2017-02-27
Supplement: mmc3.pdf [file mmc3.pdf]

# Extended schematic network of relevant pathways regulated at pH 7.8

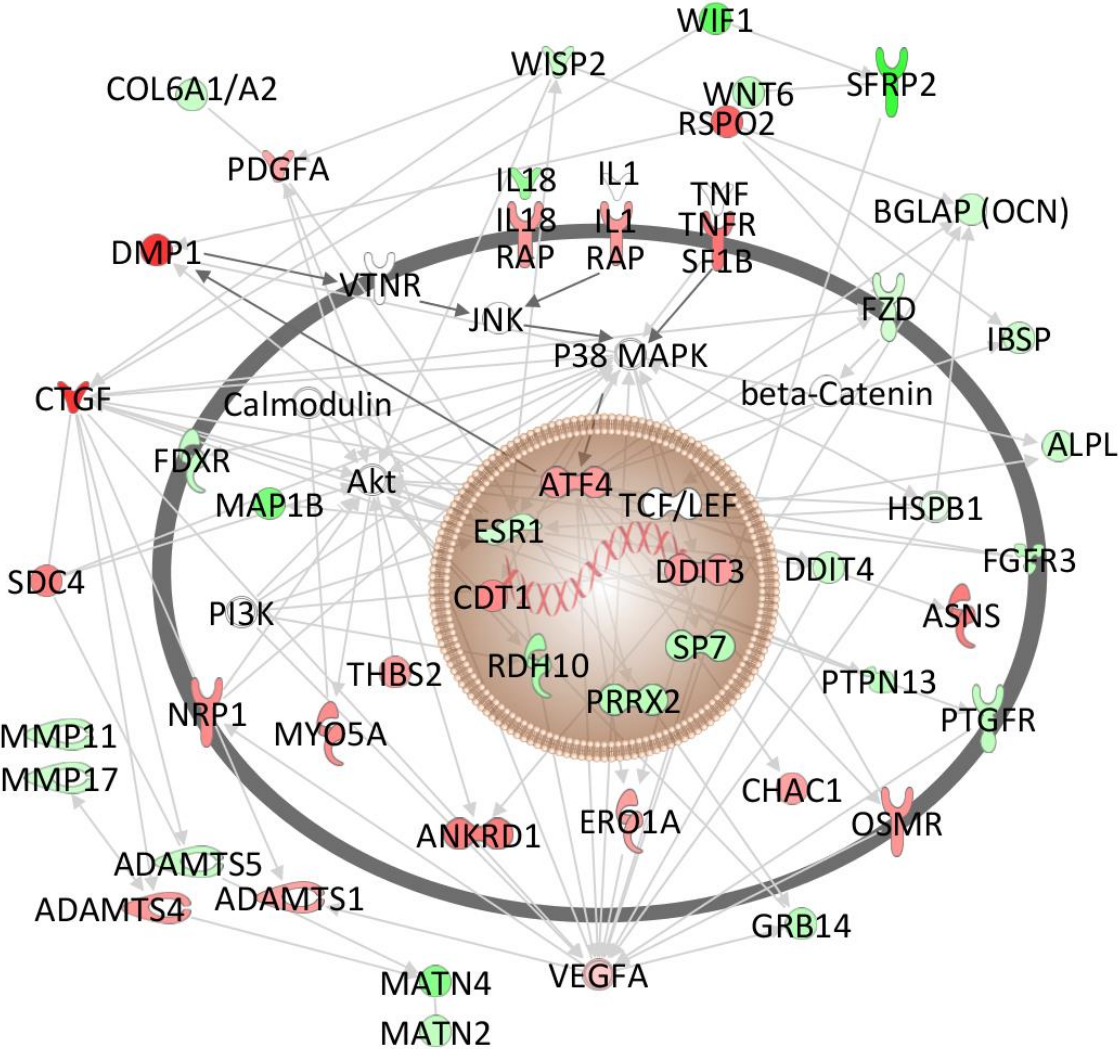

Comprehensive network of putative pathways differentially regulated at pH 7.8 versus 7.4. Upregulated genes (red symbols), down-regulated genes (green symbols), and insignificantly regulated genes (white symbols) were arranged according to a global Ingenuity Pathway Analysis.
